# Supplementary material
Source: Research Square preprint supplement (doi:10.21203/rs.3.rs-9415881/v1)
Supplement: Supplementary file 3 [file 6972f020503eaf5c58635fef.docx]

**Supplemental files**

**Figure S1. ARID1A PRISMA core interaction set.** Interaction profile depicting number of binding proteins identified per peptide, and graphs representing peptide properties, aligned to ARID1A domain diagram and intrinsic disorder region (IDR) prediction plot from IUPred2A. ARID1A domains and intrinsic disorder plots are as in Figure 1.

**Figure S2. Features of ARID1A PRISMA interactome.** A, GO term enrichments of the PRISMA core interaction dataset. B, Venn diagram of the overlap between the ARID1A physical interactome (from BioGRID) and the PRISMA interaction set.

**Figure S3.** **ARID1A post-translational modifications.** Data from PhosphositePlus database (accessed 01.10.2025).

**Figure S4. Characterisation of ARID1A S363A and S363D mutants.** A, Immunoblot analysis of ARID1A in wt emGFP-ARID1A, emGFP-ARID1A_S363A, emGFP-ARID1A_S363D and parental RPE1 cell lines after 24 h induction with 1 ug/ml doxycycline. α-tubulin was used as loading control. B, Immunoblot analysis of emGFP-ARID1A fusion proteins in mutant ARID1A cell lines, untreated or treated with proteasome inhibitor MG132 (10 mM) for 12 h after 12 h doxycycline induction. Ponceau Red staining was used to assess equal loading. C, Primary sequence analysis of GFP-ARID1A mutant fusion proteins characterised by GFP affinity purification followed by MS analysis. Expression of ARID1A_S363A and ARID1A_S363D was induced for 6 h. Dark segments represent peptides detected by MS. D, BAF complex subunits identified in GFP immunoprecipitates from ARID1A S363A and S363D mutant cell lines. Numbers of peptide spectrum matches for each protein are shown. E, Fluorescence images showing the localisation of ARID1A S363A and S363D mutants in RPE1 cells after 24 h induction. Images of GFP-expressing cells were taken using an Evos M5000 (Thermo) at 10x magnification.

**Table S1. ARID1A PRISMA peptide set.** Related to Figure 1

**Table S2. ARID1A PRISMA dataset.** Related to Figure 1

**Table S3. GO term and protein domain enrichments of the ARID1A PRISMA dataset.** Related to Figure S2

**Table S4. List of peptides in CDK2/CCNA2 validation arrays.** Related to Figure 6

**Table S5. GO term, KEGG pathway and Hallmark gene set enrichments on RNA-seq data**. Related to Figure 7

**Table S6. GO term and KEGG pathway enrichments on proteomics profiling data.** Related to Figure 7

**Table S7. List of antibodies used in this study.**

**Table S8. Primer sequences and constructs used in this work.**
