# Supplementary material
Source: Research Square preprint supplement (doi:10.21203/rs.3.rs-9415881/v1)

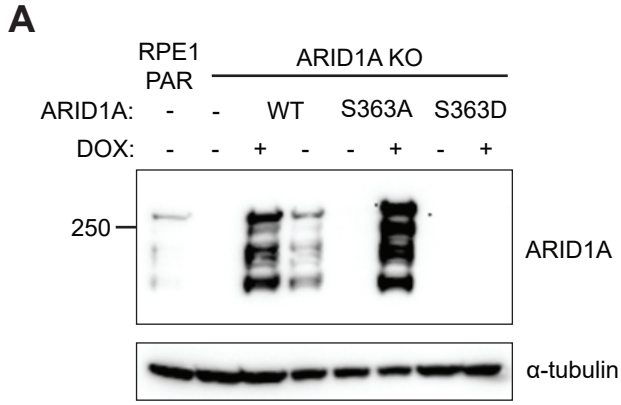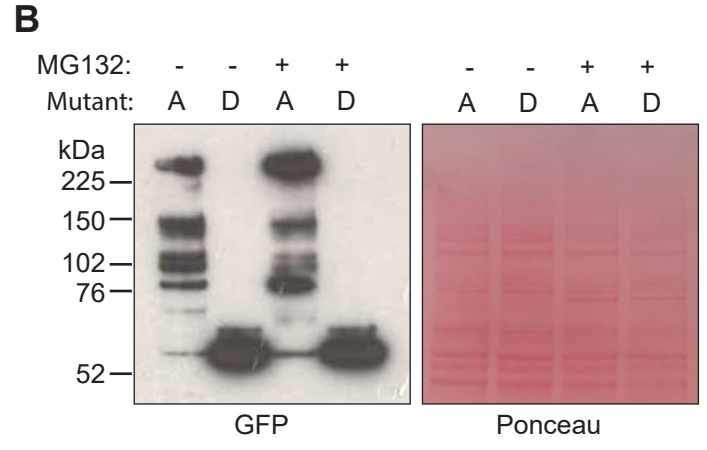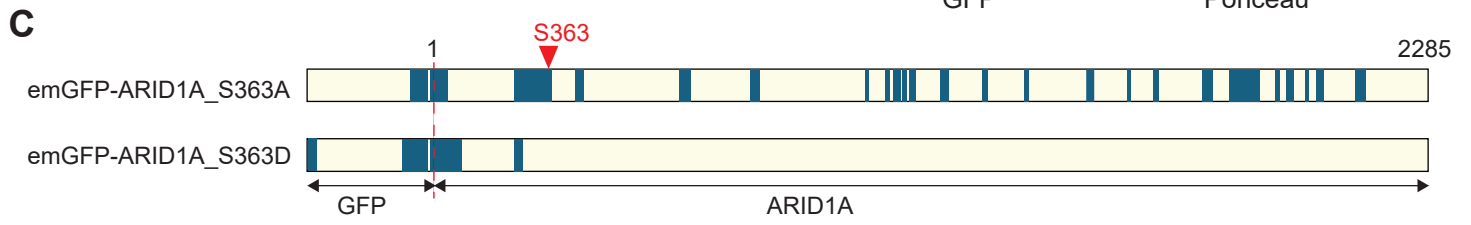

**D**

| Gene name    | S363D | S363A |
|--------------|-------|-------|
| emGFP-ARID1A | 23    | 45    |
| SMARCC1      |       | 8     |
| SMARCC2      |       | 5     |
| SMARCA4      |       | 3     |
| SMARCB1      |       | 3     |
| ACTL6A       |       | 3     |
| SMARCE1      |       | 1     |
| BCL7C        |       | 1     |
| SMARCD1      |       | 1     |
| DPF2         |       | 1     |
| SMARCA2      |       | 1     |

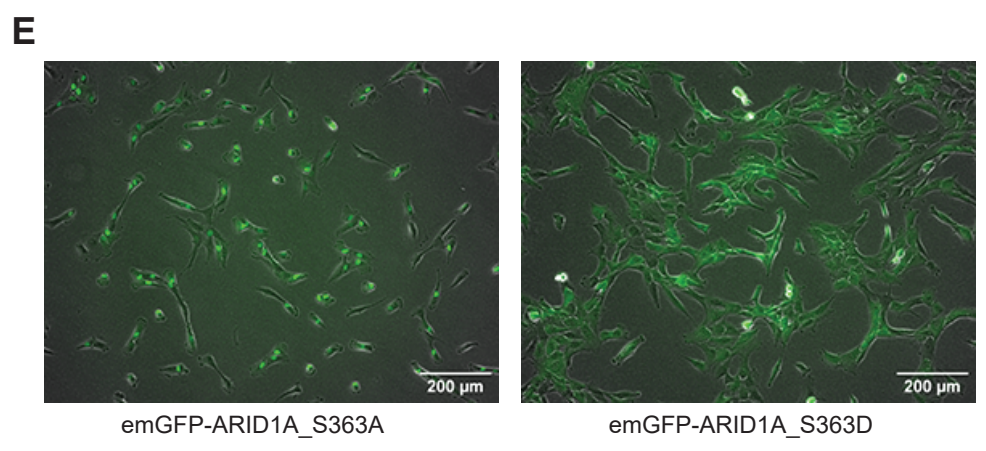

Supplement: Supplementary file 1 [file 5cd59e1b603a3fb4a24320e5.pdf]

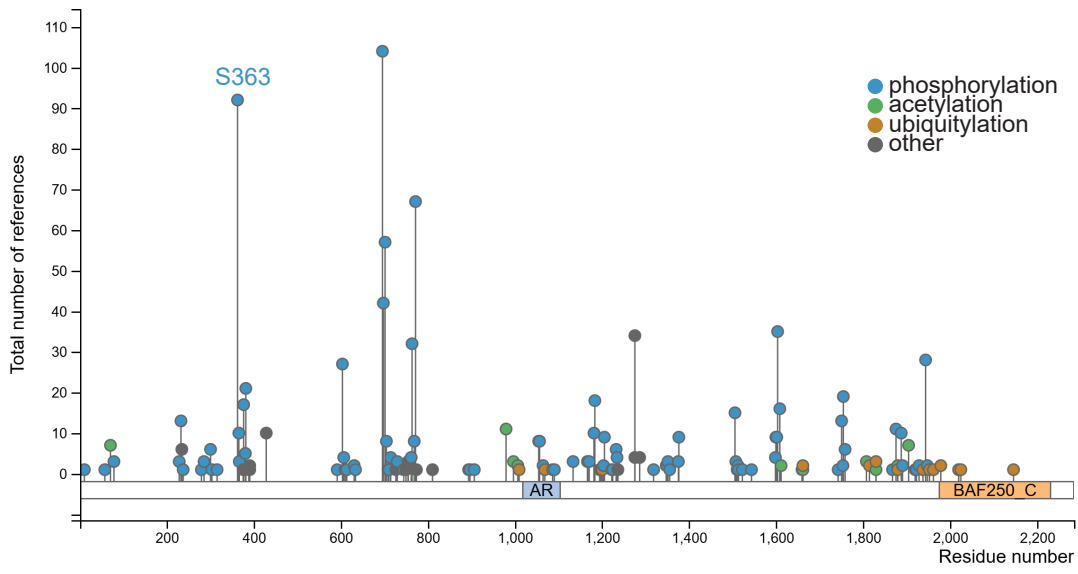

Supplement: Supplementary file 2 [file 6708592836fe812a36a36c85.pdf]

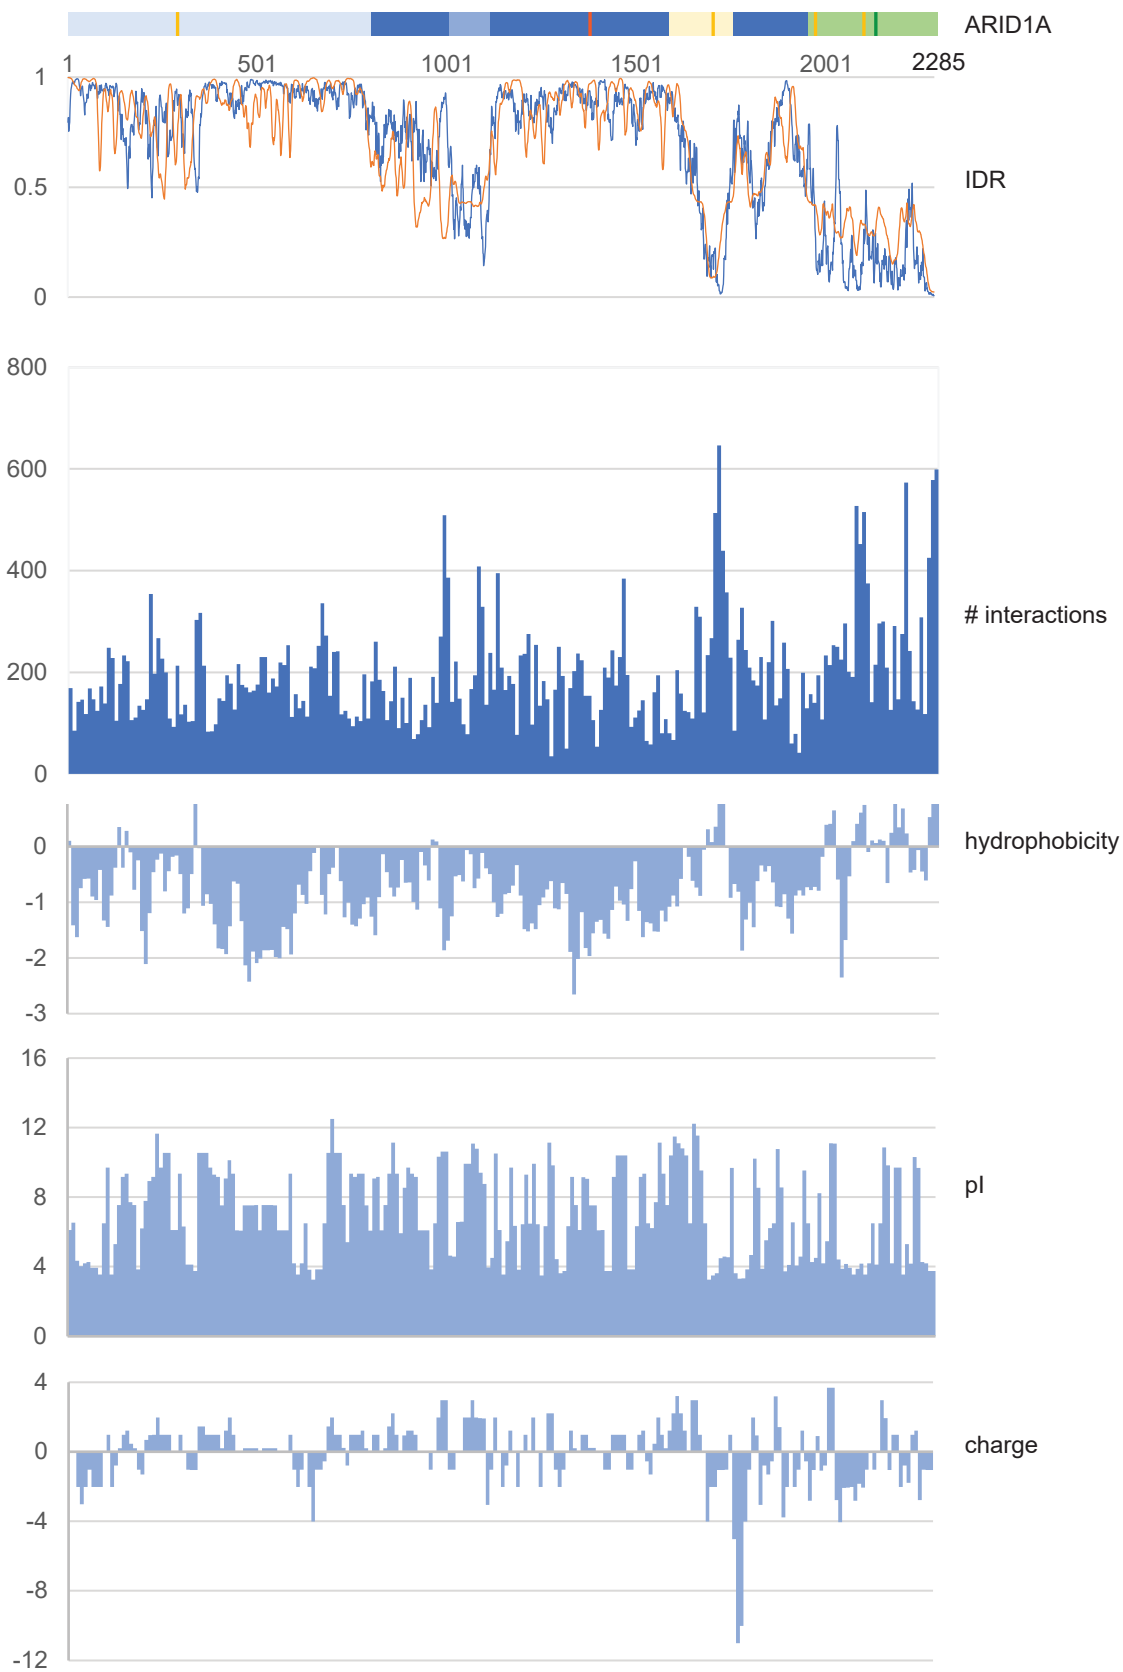

Supplement: Supplementary file 4 [file fe469752b28894add6003655.pdf]

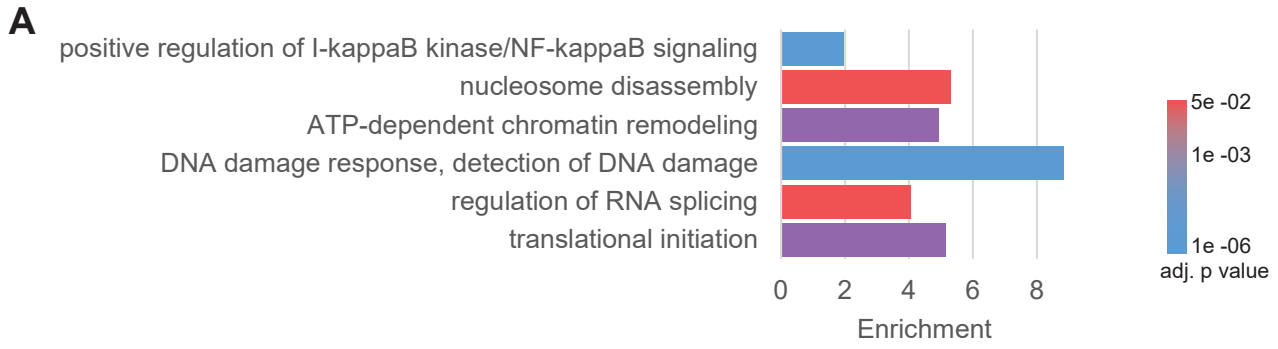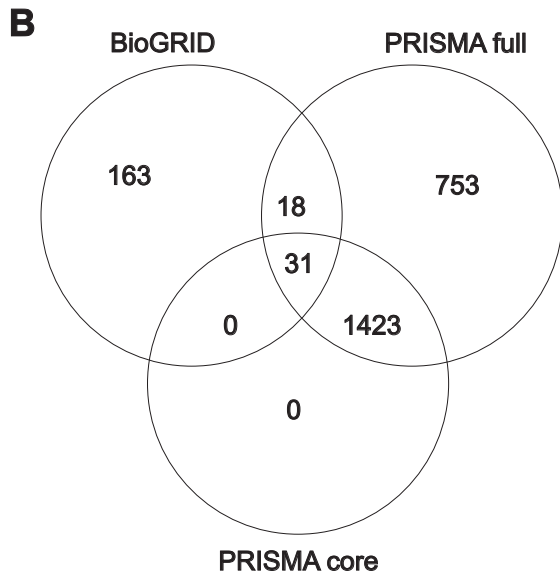

Supplement: Supplementary file 5 [file ff102060f94c3952eda24967.pdf]
